# Supplementary material
Source: PubMed Central journal article supplement (PMC6886517)
Supplement: NIHMS1038422-supplement-Checklist.pdf [file NIHMS1038422-supplement-Checklist.pdf]

## ICU Checklist Project Clinician Interview Script

We are interested in learning more about how clinicians perceive rounding checklists in the ICU. By rounding checklist, we mean a tool used to remind clinicians to address specific topics on rounds related to health care quality or efficiency. We would like to hear about your experiences with checklists during rounds and your opinions about the ways in which checklists impact patient care. Your answers will be kept completely confidential; no one will be able to associate you with your answers or with your ICU. You will be identified by an ID number and profession and not by name. Thank you for taking the time to talk with us today.

Begin recording and make sure to state the **date, time, and participant ID number and profession.**

Before we talk about checklists, let's talk about daily rounds in general.

1. What would you say is the purpose of daily rounds?
  - a. If on a certain day you were to say that rounds went really well, what would that mean?
  - b. If on a certain day you were to say that rounds went really poorly, what would that mean?

Now let's talk about rounding checklists in general.

2. What do you see is the purpose of rounding checklists?
3. Under what circumstances do you think that checklists are most likely to be helpful?
  - a. Under what circumstances do you think that checklists are less likely to be helpful?
  - b. In your opinion, are there circumstances in which checklists may negatively impact care?
    - i. If so, how?
  - c. What would you include in a checklist in order to have the greatest impact on quality of care?
4. What is your opinion of checklists? (preference)
5. In general, what does the ICU rounding team think of checklists?
  - a. In general, what does the ICU's leadership think of checklists?
6. How many checklists do you use in a day?

Next, I would like to ask about rounding checklists in this ICU.

7. Does your ICU currently use a rounding checklist?
  - If no,
    - a. Has your ICU ever used a rounding checklist?
      - If yes, tell me about the decision to stop using the checklist. [probe for who made the decision and the reasons]

- If no, what are some of the reasons this ICU has never used a rounding checklist?
- b. Please describe how evidence based practices are brought up during rounds. [probe for who brings up, what is brought up, and if for every patient]
- If yes, let's talk about the rounding checklist that you use in your ICU:  
[give them a copy of their checklist]
- c. Is there a standard way that the rounding checklist is used? [Probe for who leads the checklist]
  - If yes, please describe the standard use.
  - If no, please describe any variability in checklist use.
- d. Do you use it on every single patient every day?
  - If yes, how do you ensure that's the case?
  - If no, when would it not be used?
- e. Does everyone get a copy of the checklist?
- f. Do you have your own checklist or a checklist that you have created for yourself?
- g. Does any part of the checklist become part of the patient's EMR?
- h. If a written checklist is used, where does the checklist go once you are finished with it?
- i. Now let's talk about barriers and facilitators to rounding checklist use:
  - i. What are the challenges to using a rounding checklist in this ICU?
  - ii. What things make it easier to use a rounding checklist in this ICU?
- j. What do you like about this checklist? (Probe: How it looks? What it covers?)
  - i. What changes would you make to this checklist? (Probe: How it looks? What it covers?)
    - a. How might it be streamlined?
    - b. How might it be augmented?
  - ii. During your time in this ICU, has the rounding checklist been revised or updated?
    - If, yes, please tell me what was changed?
- 8. Is there anything else that you think is important for us to know about checklist use?

Thank you!
